# Supplementary material for: Indigenous Australian genomes show deep structure and rich novel variation
Source: Springer Nature journal article supplement (doi:10.1038/s41586-023-06831-w), 2023-12-13
Supplement: 41586_2023_6831_MOESM2_ESM.pdf [file 41586_2023_6831_MOESM2_ESM.pdf]

## Reporting Summary

Nature Portfolio wishes to improve the reproducibility of the work that we publish. This form provides structure for consistency and transparency in reporting. For further information on Nature Portfolio policies, see our [Editorial Policies](#) and the [Editorial Policy Checklist](#).

### Statistics

For all statistical analyses, confirm that the following items are present in the figure legend, table legend, main text, or Methods section.

- | n/a                                 | Confirmed                                                                                                                                                                                                                                                                                      |
|-------------------------------------|------------------------------------------------------------------------------------------------------------------------------------------------------------------------------------------------------------------------------------------------------------------------------------------------|
| <input type="checkbox"/>            | <input checked="" type="checkbox"/> The exact sample size ( $n$ ) for each experimental group/condition, given as a discrete number and unit of measurement                                                                                                                                    |
| <input type="checkbox"/>            | <input checked="" type="checkbox"/> A statement on whether measurements were taken from distinct samples or whether the same sample was measured repeatedly                                                                                                                                    |
| <input type="checkbox"/>            | <input checked="" type="checkbox"/> The statistical test(s) used AND whether they are one- or two-sided<br><i>Only common tests should be described solely by name; describe more complex techniques in the Methods section.</i>                                                               |
| <input type="checkbox"/>            | <input checked="" type="checkbox"/> A description of all covariates tested                                                                                                                                                                                                                     |
| <input type="checkbox"/>            | <input checked="" type="checkbox"/> A description of any assumptions or corrections, such as tests of normality and adjustment for multiple comparisons                                                                                                                                        |
| <input type="checkbox"/>            | <input checked="" type="checkbox"/> A full description of the statistical parameters including central tendency (e.g. means) or other basic estimates (e.g. regression coefficient) AND variation (e.g. standard deviation) or associated estimates of uncertainty (e.g. confidence intervals) |
| <input type="checkbox"/>            | <input checked="" type="checkbox"/> For null hypothesis testing, the test statistic (e.g. $F$ , $t$ , $r$ ) with confidence intervals, effect sizes, degrees of freedom and $P$ value noted<br><i>Give <math>P</math> values as exact values whenever suitable.</i>                            |
| <input type="checkbox"/>            | <input checked="" type="checkbox"/> For Bayesian analysis, information on the choice of priors and Markov chain Monte Carlo settings                                                                                                                                                           |
| <input checked="" type="checkbox"/> | <input type="checkbox"/> For hierarchical and complex designs, identification of the appropriate level for tests and full reporting of outcomes                                                                                                                                                |
| <input type="checkbox"/>            | <input checked="" type="checkbox"/> Estimates of effect sizes (e.g. Cohen's $d$ , Pearson's $r$ ), indicating how they were calculated                                                                                                                                                         |

*Our web collection on [statistics for biologists](#) contains articles on many of the points above.*

### Software and code

Policy information about [availability of computer code](#)

Data collection

Data analysis

```
ggplot2 v3.3.5
ggmap v3.0.0
R 'stats' package
IBDNe
BEAST v2.6.0
Tracer v1.7
AdmixtureBayes v0.3
```

For manuscripts utilizing custom algorithms or software that are central to the research but not yet described in published literature, software must be made available to editors and reviewers. We strongly encourage code deposition in a community repository (e.g. GitHub). See the Nature Portfolio [guidelines for submitting code & software](#) for further information.

## Data

Policy information about [availability of data](#)

All manuscripts must include a [data availability statement](#). This statement should provide the following information, where applicable:

- Accession codes, unique identifiers, or web links for publicly available datasets
- A description of any restrictions on data availability
- For clinical datasets or third party data, please ensure that the statement adheres to our [policy](#)

Data availability: All sequencing data (fastq), variant calls (ancestry masked and unmasked VCFs), and metadata (anonymised individual IDs and locations) have been deposited in the Australian National Computational Infrastructure (NCI), Canberra under project identifier TE53. Access can be requested in writing to the NCIG Collection Access and Research Advisory Committee (CARAC), overseen by the Indigenous majority NCIG Board, by emailing [jcsmr.ncig@anu.edu.au](mailto:jcsmr.ncig@anu.edu.au). Requests for data access for external research will be assessed in accordance with the NCIG Governance Framework available at <https://ncig.anu.edu.au/files/NCIG-Governance-Framework.pdf>. The data is available for general research use subject to meeting the requirements of the NCIG Governance Framework.

GRCh38.p13 - Human Genome assembly GRCh38.p13  
 EGAD00001001634 - Papuan Genomes: high depth (30x) whole genome sequence data - <https://ega-archive.org/datasets/EGAD00001001634>  
 PRJNA314367 - Genetic history of Melanesian individuals - <https://www.ncbi.nlm.nih.gov/bioproject/?term=PRJNA314367>  
 EGAD00010001326 - Papuan\_Genotyping - <https://ega-archive.org/studies/EGAS00001001587>

## Human research participants

Policy information about [studies involving human research participants and Sex and Gender in Research](#).

Reporting on sex and gender

Approximately equal males and females were included.

Population characteristics

Geographic sampling locations were an important variable of this work. No phenotypic information was included. Variables such as age do not affect the results of this study.

Recruitment

The selection of communities was partly based on inclusion of diverse language groups, logistical access, and the presence of historical samples in the NCIG collection.

Within communities there was the possibility of non-random sampling with respect to genetics, i.e. including multiple samples from within a family. We addressed this by obtaining the largest sample size possible and excluding individuals based on genetic kinship estimates. Participants were recruited by volunteering, so we cannot exclude the possibility of some bias due to propensity to volunteer, but otherwise the sampling of individuals is random.

Ethics oversight

ANU ethics protocol 2015/065  
 University of Melbourne Ethics protocol 1852770  
 NCIG Governance Board oversight and approval

Note that full information on the approval of the study protocol must also be provided in the manuscript.

## Field-specific reporting

Please select the one below that is the best fit for your research. If you are not sure, read the appropriate sections before making your selection.

Life sciences  Behavioural & social sciences  Ecological, evolutionary & environmental sciences

For a reference copy of the document with all sections, see [nature.com/documents/nr-reporting-summary-flat.pdf](https://nature.com/documents/nr-reporting-summary-flat.pdf)

## Life sciences study design

All studies must disclose on these points even when the disclosure is negative.

Sample size

Sample size (which is clearly defined in the methods) was determined by the limitations of community engagement, but is the largest sample of Indigenous Australian genomes to date. The manuscript explores in detail the relationship between sample size and variant recovery.

Data exclusions

There are four levels of data exclusion.

1. The variant calls from a single sample were consistent with DNA cross-contamination, thus this sample was excluded for technical reasons.

2. 10 samples showed evidence of recent ancestry for both the Tiwi and a non-Tiwi Island population and were considered separately from the other Tiwi individuals.  
 3. Genomic regions of non-Indigenous ancestry were masked in most analyses. The decision to mask non-indigenous ancestry was pre-established and carried out using appropriate reference panels.  
 4. Exclusions due to kinship. We sought a sample of unrelated individuals so we used genetics to identify closely related individuals and excluded as many samples as required to give an unrelated sample. This is discussed clearly in the manuscript.  
 5. Several individuals were sequenced twice to estimate variant call error rates.  
 All four exclusions are clearly discussed and justified in the manuscript.

|               |                                                                                                                                                                                                                                                                                                                                                                                                                                                                                                             |
|---------------|-------------------------------------------------------------------------------------------------------------------------------------------------------------------------------------------------------------------------------------------------------------------------------------------------------------------------------------------------------------------------------------------------------------------------------------------------------------------------------------------------------------|
| Replication   | Sub-sampling and re-sampling were carried out where appropriate for the methods used, and this is noted in the text e.g. Figure 1 and Figure 5. Several individuals were sequenced twice to estimate variant call error rates.                                                                                                                                                                                                                                                                              |
| Randomization | Participants were not allocated to experimental groups. This is essentially a descriptive study. Clearly geographic sampling location was the key grouping considered, but this is not randomization by the researchers. For some analyses we subsampled from the groups to ensure fair comparisons. In these cases the subsampling was random (with some conditions such as seeking to maintain samples with the greatest inferred Indigenous ancestry. In all case this is clearly explained in the text. |
| Blinding      | This is not a randomized control trial and blinding is not necessary. That said, the researchers were blind to the identities of the participants and only knew their sampling location along with their genomic data. For a descriptive study, such as this, blinding is not necessary.                                                                                                                                                                                                                    |

## Reporting for specific materials, systems and methods

We require information from authors about some types of materials, experimental systems and methods used in many studies. Here, indicate whether each material, system or method listed is relevant to your study. If you are not sure if a list item applies to your research, read the appropriate section before selecting a response.

### Materials & experimental systems

| n/a                                 | Involvement in the study                               |
|-------------------------------------|--------------------------------------------------------|
| <input checked="" type="checkbox"/> | <input type="checkbox"/> Antibodies                    |
| <input checked="" type="checkbox"/> | <input type="checkbox"/> Eukaryotic cell lines         |
| <input checked="" type="checkbox"/> | <input type="checkbox"/> Palaeontology and archaeology |
| <input checked="" type="checkbox"/> | <input type="checkbox"/> Animals and other organisms   |
| <input checked="" type="checkbox"/> | <input type="checkbox"/> Clinical data                 |
| <input checked="" type="checkbox"/> | <input type="checkbox"/> Dual use research of concern  |

### Methods

| n/a                                 | Involvement in the study                        |
|-------------------------------------|-------------------------------------------------|
| <input checked="" type="checkbox"/> | <input type="checkbox"/> ChIP-seq               |
| <input checked="" type="checkbox"/> | <input type="checkbox"/> Flow cytometry         |
| <input checked="" type="checkbox"/> | <input type="checkbox"/> MRI-based neuroimaging |
